# Supplementary material for: Leveraging the Structure of DNAJA1 to Discover Novel Potential Pancreatic Cancer Therapies
Source: MDPI journal article supplement (doi:10.3390/biom12101391), 2022-09-29
Supplement: s1 [file s1]

**Supplemental Information**  
**for**  
**Leveraging the Structure of DNAJA1 to Discover Potentially Novel Pancreatic Cancer Therapies**

Heidi E. Roth,<sup>1</sup> Aline de Lima Leite,<sup>1,2</sup> Nick Palermo,<sup>3</sup> and Robert Powers<sup>1,2\*</sup>

<sup>1</sup>*Department of Chemistry, University of Nebraska-Lincoln, Lincoln NE 68588-0304*

<sup>2</sup>*Nebraska Center for Integrated Biomolecular Communication, University of Nebraska-Lincoln,  
Lincoln NE 68588-0304*

<sup>3</sup>*Holland Computing Center, University of Nebraska-Lincoln, Lincoln, NE 68588-0150*

\*To whom correspondence should be addressed:

Robert Powers  
University of Nebraska-Lincoln  
Department of Chemistry  
722 Hamilton Hall  
Lincoln, NE 68588-0304  
Email: [rpowers3@unl.edu](mailto:rpowers3@unl.edu)  
Phone: (402) 472-3039  
Fax: (402) 472-9402

**Keywords:** DNAJA1, Molegro Virtual Docker, drug discovery, Hsp40

## **Table of Contents**

**Figure S1. DNAJA1-107 amino acid sequence.**

**Figure S2. Structures and nomenclatures of lead compounds.**

**Figure S3. Binding of 7727968 to DNAJA1-107.**

**Figure S4. Binding of 910120 to DNAJA1-107.**

**Table S1. Phosphorous compounds used to calibrate ligand efficiency (LE).**

**Table S2. Pairwise Tanimoto coefficients for lead compounds.**

**MVKETYYDVLGVKPNATQEELKKAYRKLALKYHPDKNPNEGEKFKQISQA**  
**YEVLSDKRLGGEQAIKEGGAGGGFGSPMDIFDMFFGGGGRMQRERRGKNV**

**Figure S1. DNAJA1-107 amino acid sequence.** One letter amino acid code for the first 107 residues of DNAJA1. Residues in red denote missing assignments in the NMR data.

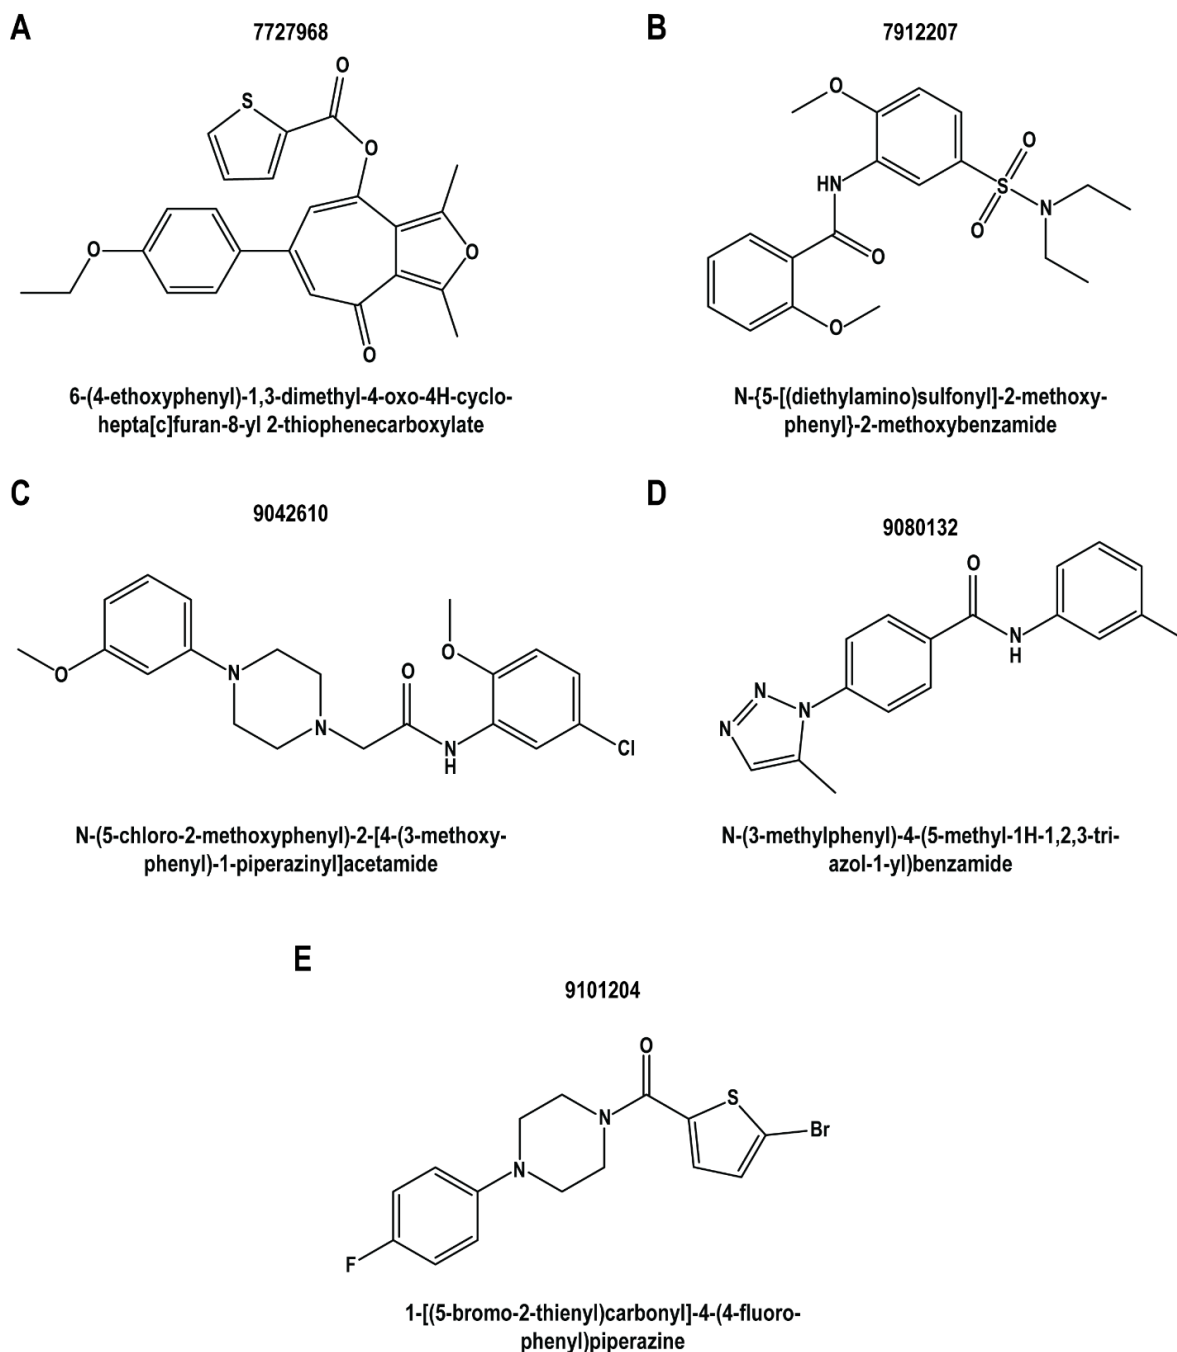

**Figure S2. Structures and nomenclatures of lead compounds.** Compounds confirmed to bind DNAJA1-107 were ordered from Hit2Lead.com<sup>©</sup> and include **A.** 7727958, **B.** 7912207, **C.** 9042610, **D.** 9080132, and **E.** 9101204.

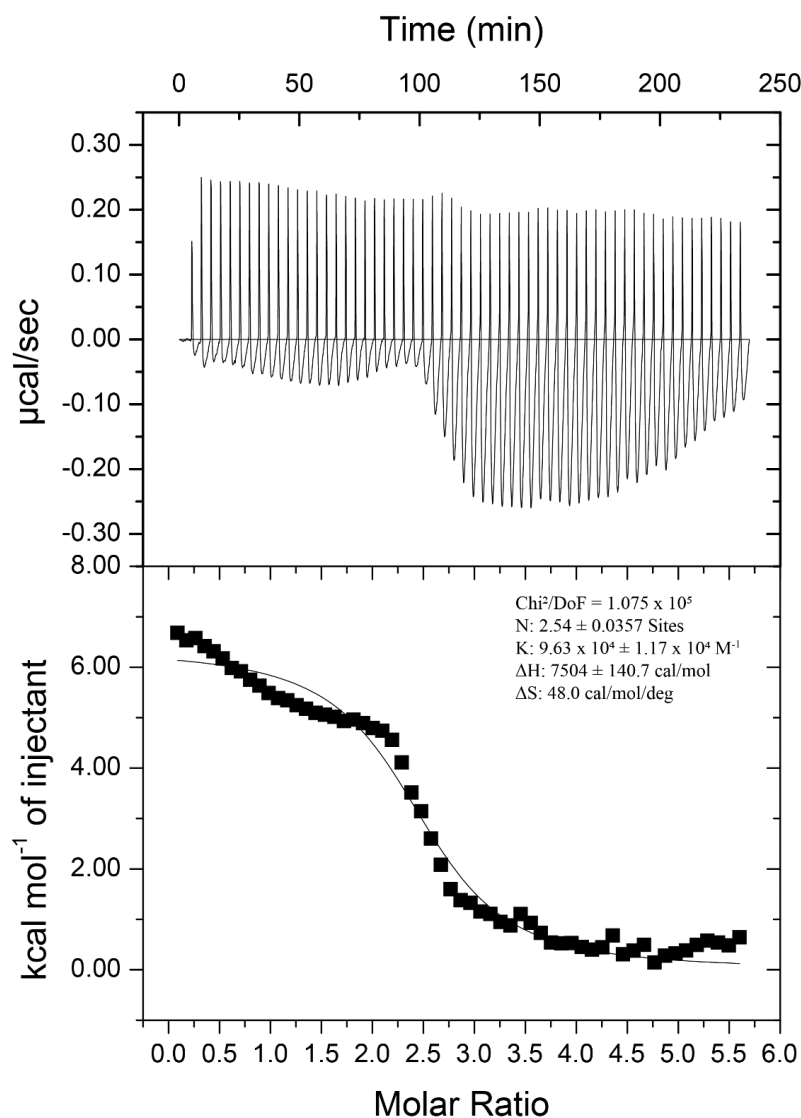

**Figure S3. Binding of 7727968 to DNAJA1-107.** Isothermal titration calorimetry (ITC) plot demonstrating the binding of 7727968 to DNAJA1-107. (*top*) Raw isothermal ITC data corresponding to the heat intensity versus injection number and plotted as equivalent ratios. (*bottom*) Plot of the integrated enthalpies normalized per mol of injectant and normalized against the equivalent ratios. The raw data was fit to a standard binding curve with stoichiometry set as a variable. The best-fit line is superimposed onto the experimental data and the resulting thermodynamic parameters are shown as an insert.

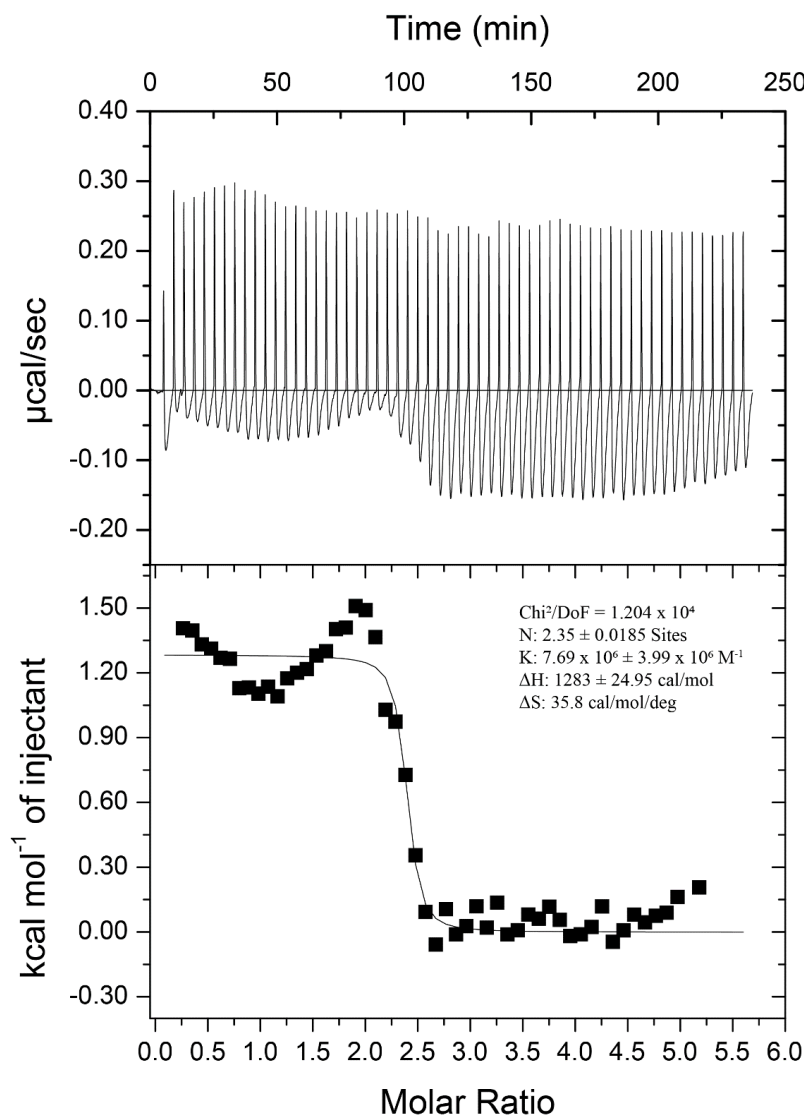

**Figure S4. Binding of 910120 to DNAJA1-107.** Isothermal titration calorimetry (ITC) plot demonstrating the binding of 910120 to DNAJA1-107. (*top*) Raw isothermal ITC data corresponding to the heat intensity versus injection number and plotted as equivalent ratios. (*bottom*) Plot of the integrated enthalpies normalized per mol of injectant and normalized against the equivalent ratios. The raw data was fit to a standard binding curve with stoichiometry set as a variable. The best-fit line is superimposed onto the experimental data and the resulting thermodynamic parameters are shown as an insert.

**Table S1. Phosphorous compounds used to calibrate ligand efficiency (LE)**

6 -Phosphogluconic acid trisodium salt  
 Adenosine 5'-diphosphate sodium salt  
 alpha-D-glucose 1,6-phosphate disodium salt hydrate  
 Dihydroxyacetone phosphate hemimagnesium salt hydrate  
 D-fructose 1,6-bisphosphate trisodium salt hydrate  
 D-fructose 6-phosphate disodium salt hydrate  
 D-Mannose 6-phosphate disodium salt hydrate  
 D-Ribose 5-phosphate disodium salt dihydrate  
 Glycerol 2-phosphate disodium salt hydrate  
 Lithium potassium acetyl phosphate  
 O-phospho-L-serine  
 O-phospho-L-Tyrosine  
 O-Sulfo-L-serine  
 rac -Glycerol 3 -phosphate disodium salt  
 Riboflavin 5'-phosphate  
 Thiamine pyrophosphate

**Table S2. Pairwise Tanimoto coefficients for lead compounds<sup>a,b</sup>**

|                | <b>7727968</b> | <b>7912207</b> | <b>9042610</b> | <b>9080132</b> | <b>9101204</b> |
|----------------|----------------|----------------|----------------|----------------|----------------|
| <b>7727968</b> | 1              | 0.30 (0.16)    | 0.16(0.16)     | 0.22 (0.16)    | 0.14 (0.16)    |
| <b>7912207</b> | 0.30 (0.16)    | 1              | 0.23(0.29)     | 0.28 (0.44)    | 0.14 (0.23)    |
| <b>9042610</b> | 0.16(0.16)     | 0.23(0.29)     | 1              | 0.20(0.26)     | 0.25(0.41)     |
| <b>9080132</b> | 0.22 (0.16)    | 0.28 (0.44)    | 0.20(0.26)     | 1              | 0.15 (0.26)    |
| <b>9101204</b> | 0.14 (0.16)    | 0.14 (0.23)    | 0.25(0.41)     | 0.15 (0.26)    | 1              |

<sup>a</sup>Values outside parentheses represent atom pair (AP) coefficients. Values in parentheses represent maximum common substructure (MCS) coefficients.

<sup>b</sup>See **Figure S2** for the compound IDs and structures
